1 **Title:** Heavily burned wood from wildfires is less likely to provide substrate for stream biota

2

3 **Author details:** Pedro Gonçalves VAZ<sup>1</sup>, Eric C. MERTEN<sup>2</sup>, Christopher T. ROBINSON<sup>3</sup>,

4 Paulo PINTO<sup>4</sup>

5

6 1. Centre for Applied Ecology “Prof. Baeta Neves” (CEABN-InBIO), School of Agriculture,

7 University of Lisbon, Tapada da Ajuda, 1349-017 Lisbon, Portugal

8 2. Forest Service, 803 W 2<sup>nd</sup> St, Cle Elum, WA, 98922, USA

9 3. Department of Aquatic Ecology, Eawag, 8600 Duebendorf, Switzerland and Institute of

10 Integrative Biology, ETH-Zürich, 8092 Zürich, Switzerland

11 4. Institute of Earth Sciences (ICT), Rua Romão Ramalho, 59, 7002 – 554 Évora

12

13 **Corresponding author:** Pedro Gonçalves Vaz; pjgvaz@isa.ulisboa.pt

14    **Abstract:**

- 15    1. Increasingly severe forest fires are recruiting more heavily burned wood into streams.
- 16       Wood affects every ecological and physical process in streams differently throughout
- 17       seasons. However, little is known about the seasonality of wood functions in fire-prone
- 18       biomes and how it combines with wood burning level to guide future postfire restoration
- 19       efforts.
- 20    2. Through an extensive three-year seasonal tracking of stream wood following forest fires in
- 21       central Portugal, we examined for the first time the influence of burning level, season, and a
- 22       large suite of driving factors on the likelihood of each of four functions with primary
- 23       ecological consequences — retention of organic matter, serving as substrate for aquatic
- 24       biota, being key pieces forming wood jams, and deflecting flow including pool habitat
- 25       formation.
- 26    3. Our results strongly support that one of the main ecological functions of wood in rivers,
- 27       i.e. to provide substrate for biological organisms — namely for vegetation, periphyton,
- 28       biofilms, and ovipositions — can be negatively affected in heavily burned wood.
- 29    4. Except for jam formation, the probability of each stream wood function changed markedly
- 30       with season and the probability of non-function was nearly twice as high in the
- 31       Euro-Mediterranean dry as in the wet season.
- 32    5. More anchored and decayed wood increased the probability of all functions, whereas the
- 33       effect of submergence depended on the function. Challenging the "size paradigm" assuming
- 34       larger-sized pieces to provide more function, our data suggest the effect of size to be
- 35       function-specific.
- 36    6. *Synthesis and applications.* We show how postfire restoration success can be maximized
- 37       by selecting the most appropriate wood, taking advantage of attribute-function
- 38       relationships and choosing the right timing for operations. We urge managers to refrain

39 from removing wood or to selectively remove the most heavily carbonized only, allowing  
 40 the persistence of great potential to provide substrate for stream biota. The non-attraction  
 41 of heavily burned wood as substrate can be compensated for by other wood with attributes  
 42 enhancing this function, such as wood deeper within the bankfull area, and with large  
 43 diameters. These results help to inform successful management, as is increasingly asked  
 44 from restoration ecology.

45

46 **Keywords:** restoration ecology, postfire restoration, woody debris, river systems,  
 47 disturbance, seasonal effects, Mediterranean, periphyton, biofilm, ovipositions.

## 48 **Introduction**

49 Wood in rivers has critically important functions in biomes worldwide (Gregory et al.  
50 2003). Practitioners increasingly use wood in stream restoration (Kail et al. 2007, Howell et  
51 al. 2012, Foote et al. 2020), largely because it is essential for many aquatic biota (Merten et  
52 al. 2014, Enefalk & Bergman 2016, McDonald et al. 2018). Major disturbances such as  
53 wildfire lead to acute shifts in quantity and character of wood inputs to streams (Zelt & Wohl  
54 2004, Jones & Daniels 2008, Vaz et al. 2011, 2013a, 2013b, 2015). Some functions may be  
55 more compromised by wood burning and the effects may vary with season. In many fire-  
56 prone areas, seasonality can be especially marked but the intra-annual dynamics of wood  
57 functions in streams and their correlation with the level of wood burning by forest wildfires  
58 have been little studied to date.

59 Wood can affect virtually every biological and physical process in streams (Gregory et al.  
60 2003, Coe et al. 2009, Merten et al. 2013, Molokwu et al. 2014). We refer to such wood  
61 pieces as functional; i.e., performing some observable function in the stream (Cordova et al.  
62 2007, Vaz et al. 2013b). Functions with primary ecological consequences on streams include  
63 the retention of organic matter (Osei et al. 2015), serving as substrate for aquatic biota  
64 (McLachlan 1970), being key stable pieces forming wood jams (Abbe & Montgomery 2003)  
65 and deflecting flow (Mutz 2000). These wood functions have been examined globally for  
66 decades, but much less is known about what characteristics of individual wood pieces favor a  
67 particular function (Rosenfeld & Huato 2003). It is widely assumed that larger-sized and  
68 stable pieces provide more function. Yet, most studies have focused on the relationship  
69 between wood quantity and channel structure (Chen et al. 2008, Grabowski et al. 2019). In  
70 particular, it is not known how wood burning influences particular functions.

71 Burned wood may be straighter and have fewer branches than non-burned wood (Agee  
72 1993), which may negatively affect its retention of matter, jam formation, and flow deflection  
73 functions. Burned wood may also be thicker in diameter and more decayed than non-burned  
74 wood, which may positively affect these aforementioned functions (Jones et al. 2011, Vaz et  
75 al. 2011). Fire-derived changes in physical and chemical properties may also affect wood  
76 substrate function. Water and extractants (namely lipids and terpenoid hydrocarbons) are lost  
77 in burned wood and charcoal tends to be biologically inert, whereas volatilization of repellent  
78 compounds may occur (Hyde et al. 2011), making burned wood arguably more attractive than  
79 unburned wood to provide substrate for organisms and ovipositioning (Vaz et al. 2014).  
80 Across streams with seasonal flow patterns in fire-prone biomes, seasonal drying (Verkaik et  
81 al. 2013) may play a role as important as burn status in wood functions (Flores et al. 2017). In  
82 wet seasons like spring in the Euro-Mediterranean region, wood functions such as matter  
83 retention, substrate provisioning, and flow deflection can be more enhanced than in the dry  
84 season with low or intermittent flows. The study of the effect of the burn status and season on  
85 functions will help practitioners seeking postfire restoration approaches that ‘work with  
86 natural processes’ to deliver ecological and geomorphological outcomes (Grabowski et al.  
87 2019).

88 Incorporating wood into river restoration and management involves considering a set of  
89 wood attributes that may greatly alter function. Structural attributes include piece diameter,  
90 length, complexity (sensu Newbrey et al. 2005), decay state, and form (Cordova et al. 2007).  
91 For example, probability of flow deflection, including pool habitat formation, can increase  
92 with wood diameter (Magilligan et al. 2008). Longer and more complex wood can form jams  
93 (Abbe & Montgomery 2003). Decayed wood can contribute more to matter retention, jams,  
94 and flow deflection forming riffles and pools (Jones et al., 2011). Critical attributes  
95 concerning wood relationships with the stream channel include the level of submergence and

96 how it rests within the channel (position), degree of anchoring, percentage within bankfull,  
 97 and distance to the bank (Parsons & Thoms 2007). For instance, more submerged wood is  
 98 more likely to serve as substrate for aquatic biota. More anchored and decayed wood, as  
 99 indicators of stability and longevity, are relevant for a broad spectrum of wood functions.  
 100 Although a great deal is known about how wood functions in rivers, these feature-function  
 101 relationships have seldom been analyzed in a single dataset. Once assessed, these  
 102 relationships can be harnessed to deliver multiple ecological benefits to the lotic ecosystem.

103 In this study, we analyzed the potential of combining wood burned level, season, and a  
 104 large suite of functional driving factors to guide postfire restoration efforts in lotic  
 105 ecosystems. To this end, we monitored over three years the influence of these factors on the  
 106 likelihood of each of four primary functions — matter retention, substrate provisioning, jam  
 107 formation, and flow deflection — by wood pieces in streams of burnt areas in central  
 108 Portugal. Because there seems to be a trend for large wood in rivers to become scarcer in  
 109 these fire-prone forest areas (Silva et al. 2011, Moreira et al. 2011, Vaz et al. 2011, 2013a),  
 110 each piece of wood will have increased importance and the maintenance of more functional  
 111 wood in rivers is an important conservation target in these areas. Specifically, we addressed  
 112 the following three questions: (a) do forest fires change the probabilities of specific stream  
 113 wood functions through the burned level inflicted? (b) are functions stable between dry and  
 114 wet seasons in a region like the Mediterranean or does the probability of each function  
 115 change intra-annually? (c) how can well-documented wood structural attributes and those  
 116 concerning its relationships with the channel affect specific wood functions together with the  
 117 burned level?

## Materials and methods

### *Study area and site selection*

We conducted the study in central Portugal from early October 2010 to early May 2012 in a sub-basin of the Tagus River (Rio Frio) that experienced wildfires (71% burned area) between 2003 and 2007 (Fig.1). The local climate is Mediterranean with hot, dry summers and cool, wet winters. Mean annual precipitation is 512 mm (range: 3 mm in July to 82 mm in November) and mean annual temperature is 15.8 °C (range: 9 °C in December–January to 23 °C in July–August). Rio Frio (drainage area 37 km<sup>2</sup>, mean stream gradient 5.1 %) has gentle relief with altitudes ranging from 25 to 434 m (mean ~219 m). Geology at the streams was mainly characterized by siliceous rocks with low mineralization. Land cover was 55 % forest, 22 % shrublands, and 22 % agriculture. The dominant forest was maritime pine (*Pinus pinaster*), the species most affected by wildfires in Portugal (Moreira et al. 2009, Silva et al. 2009). In the study area, maritime pine is grown for timber in monoculture stands.

Within Rio Frio, we selected three homogeneous reaches (~400 m each) having a burned sideband of at least 100 m, one each from stream order 1–3 (Strahler, 1957). The dominant substrate was gravel with some boulders in the main channel. Mean channel widths were 2.9, 5.1, and 6.0 m in the first, second, and third order reaches, respectively. The reaches had neutral–basic waters and were intermittent, with stretches remaining dry for several months, in alternating dry and wet seasons. The wet season in the Euro-Mediterranean region can vary (e.g., Craveiro et al. 2019), but in the years of data collection it lasted from November to May. The natural discharge regime is primarily precipitation-dominated with highest discharge occurring in winter. Discharge responds rapidly to precipitation events, which can result in major changes in flow over relatively short periods of time (Raven et al. 2009). Riparian zones with a distinct riparian community extended 5–15 m from the streams. The

uncultivated riparian vegetation was dominated by ash (*Fraxinus angustifolia*), alder (*Alnus glutinosa*), black poplar (*Populus nigra*), and silver wattle (*Acacia dealbata*) with a few edges of bramble-thicket (*Rubus ulmifolius*). No postfire logging was carried out and fire-killed trees were left on the ground on stream side-slopes.

# **Data collection**

To assess the intra-annual change in wood functions, we collected data on the three reaches in two dry seasons — early fall (6–16 October 2010, 6–11 October 2011) — and two wet seasons — late spring (2–10 May 2011, 8–13 May 2012). During the four surveys, we measured dead, downed wood pieces (diameter  $\geq 0.05$  m; length  $\geq 0.5$  m) and those that were still alive but entirely uprooted. We excluded snags, defined as pieces leaning or suspended over the stream at an angle greater than 30°. In wood jams (>2 pieces), we measured pieces that were accessible and whose functions were not influenced by the functions of other pieces. Only downed stream wood extending within bankfull boundaries were included in the tallies (Vaz et al. 2013b). To track wood characteristics and function, each piece was individually tagged, measured, and remeasured in the following season. We used one round blue pre-numbered anodized aluminum tag (32 mm diameter) on each end of each piece secured with a galvanized nail. For easier detection, we marked the tag place with white plastic-coated wire attached around the wood perimeter. The center of each piece was geo-referenced with a GPS unit (whenever possible, with a 0.3–1 m precision by post-processing).

Per each survey, we recorded the main function of the piece of wood in the channel regarding Retention, Substrate, Jams, or Flow (Table 1). We then recorded the following piece characteristics:

- 166 (a) Wood burn level, assessed using three classes (unburned: no char; moderately burned:  
167 charred bark but outermost ring present in at least one part of the circumference; heavily  
168 burned: charred bark and sapwood resulting in significant ring loss, Jones & Daniels 2008,  
169 Vaz et al. 2013b);
- 170 (b) Submergence, using three classes (spanning the channel cross-section, and lower or  
171 upper channel halves of the bankfull height);
- 172 (c) Decay, using the four classes proposed by Jones and Daniels (2008) (evaluating bark,  
173 branches, and overall structural integrity), later simplified into two classes (sound, decayed),  
174 coalescing the first three to get balanced classes;
- 175 (d) Form (straight, bent);
- 176 (e) Position on the stream (ramp: resting on one bank only; bridge: log spans channel,  
177 touching both banks and resting on the floodplain; loose: resting entirely on the streambed).  
178 Due to a small sample number, bridges were coalesced with ramps for analysis;
- 179 (f) Diameter, determined to the nearest 0.5 cm using a meter tape by a single measurement  
180 taken from a point considered the mean diameter by visual assessment;
- 181 (g) Length, in meters to the nearest 0.01 m for the segments of the pieces that were >1 cm  
182 in diameter;
- 183 (h) Percentage within bankfull; i.e., percentage part of the piece contained in the channel  
184 until the bankfull height;
- 185 (i) Number of anchor ends; i.e., ends or sides attached (pinned under rocks, pinned under  
186 larger logs, or in channel spanning jams) or buried (in streambed sediment) in either the bank  
187 or the stream;
- 188 (j) distance to bank; i.e., to the closest bank, in meters to the nearest 0.1 m; and

(k) complexity; i.e., branching complexity by counting attached branches and twigs according to Newbrey et al. (2005).

## *Statistical Analysis*

To evaluate the effects of wood burned level and season on probability of each stream wood function after fire, we used multinomial mixed-effects modeling with logit link (Venables and Ripley 2002) conducted in a Bayesian framework. The multinomial response included the four wood functions (Retention, Substrate, Jam, and Flow) and no observable function as the reference category. The fixed effects included the categorical variables season (factor levels = fall, spring), burned level (unburned, moderately, heavily), submergence (spanning, lower part, upper part), decay (sound, decayed), form (straight, bent), position (ramp/bridge, loose), and stream order (first, second, third). The numeric fixed covariates were diameter, length, percentage within bankfull, number of anchor ends, distance to bank, and wood complexity. Because data records were nested by wood piece, we included wood piece as the random effect factor. Prior to analysis, we centered and standardized the numeric covariates. A matrix of Spearman's correlations for initial explanatory variables revealed no collinearity ( $|r_s| \leq 0.52$  in all cases).

The minimal adequate (optimal) model was arrived at by first fitting the full model (with all the aforementioned explanatory variables simultaneously) followed by backward elimination of one explanatory variable at a time. We used Watanabe-Akaike information criterion (WAIC; Watanabe 2010) to compare the relative fit of computed models to the data, interpreting WAIC differences greater than twice its corresponding standard error as suggesting that the model with the lower WAIC fitted the data substantially better. Using the

WAIC criterion, distance to bank, wood complexity, and stream order were dropped in that order to reach the optimal model.

We created the Bayesian models in Stan computational framework (<http://mc-stan.org/>) accessed with *brms* package (Bürkner 2017). To improve convergence while controlling against overfitting, we assigned weakly informative priors to all the effect size beta parameters of the model (see Gelman 2020). We used the *normal* (0, 10) distribution for the beta in all levels of categorical variables except for season and the *normal* (0, 5) distribution for the beta in season and in the numeric variables. For each model, we ran four parallel MCMC chains until convergence was reached (all  $R_{hat} \leq 1.1$ ). Each chain had 4000 iterations (warmup = 1000, thin = 1), totaling 12,000 post-warmup samples. We assessed model adequacy using posterior predictive checks. We performed all analyses in R v. 3.6.3 (R Core Team 2020).

## Results

Over the three years of postfire wood function observations, we collected 1471 records for 567 pieces of wood. About 43% of the records were collected from burned wood (248 moderately and 385 heavily burned). The number of records was well balanced between fall (n = 700) and spring (771). Retention (385) and Substrate (368) were the most common functions, followed by Jam (223) and Flow (93). No function was observed in 402 records (Table 2).

## 232 *Burned level and seasonal effects*

233 When we accounted for the effect of the random factor (i.e., wood piece), our optimal  
 234 mixed model (Table 3) showed that heavily burned wood was less likely to function as  
 235 substrate for stream biota than unburned or moderately burned wood. After performing non-  
 236 linear hypothesis testing (Bürkner 2017, Clark 2020) for contrast effects between unburned,  
 237 moderately, and heavily burned wood regarding the Substrate function, we are 100 %  
 238 confident that heavily burned wood was less likely to provide substrate than each of the other  
 239 two burn levels. The mean of the posterior distribution was 0.05 probability of heavily burned  
 240 wood acting as a Substrate (95 % credible interval = 0.01–0.14), whereas this probability was  
 241 0.20 (0.09–0.37) and 0.31 (0.13–0.57) for unburned and moderately burned wood,  
 242 respectively (Fig. 2). Thus, the probability of becoming Substrate was 4.0 and 6.2-fold lower  
 243 in heavily burned wood than in unburned or moderately burned wood.

244 As expected, the probability of each wood function in streams was contrasting between fall  
 245 and spring. In spring, Retention (0.22; 95%-CI = 0.16–0.32), Substrate (0.34; 0.19–0.54), and  
 246 Flow (0.22; 0.12–0.37) probabilities were 2.0, 2.3, and 2.0 times higher compared to the fall.  
 247 Posterior probabilities under the hypotheses testing that these effects were greater than zero  
 248 (Clark 2020) allowed us to be 99 (Retention wood function) and 100 % (Substrate, Flow)  
 249 confident that the probabilities of these functions were higher in the spring than in the fall.  
 250 On the contrary, with regard to Jam function, our analysis allows us to be only 75 %  
 251 confident that this function would appear less likely in the spring (0.001; 95%-CI: 0.00–0.01)  
 252 compared to the fall (0.003; 0.00–0.02). The probability of non-observable function was 1.6  
 253 times higher in the fall (0.56; 95%-CI: 0.41–0.70) compared to spring (0.35; 95%-CI: 0.22–  
 254 0.49).

## 255 *Notable covariate effects*

256 Submergence had notable ( $|\beta\text{-}95\%\text{-CI}| > \sim 0$ ; Table 3) effects on the four functions, with the  
 257 wood in the upper half of the channel decreasing its probability of serving as Substrate and  
 258 deflecting Flow, while also decreasing the probability of forming Jams. Wood submerged in  
 259 the lower half of the channel (lower half of bankfull height) favored the Retention (retaining  
 260 organic matter such as twigs, leaves, fine organic matter) and Flow functions. Increased  
 261 decay of wood positively influenced the four functions. As for form, relative to straight  
 262 wood, bent wood increased the probability of Retention function and decreased the  
 263 probability of Jam (creating debris jams) function. Wood position in the stream was an  
 264 important factor, with loose wood (resting entirely on the streambed), relative to bridges and  
 265 ramps, notably increasing the probability of all functions except Retention. As for wood size,  
 266 diameter and length were contrasting for different functions; while diameter positively  
 267 influenced the Substrate function, longer lengths favored the Retention and Flow functions.  
 268 The higher the percentage of the wood piece within the bankfull channel, the more likely it is  
 269 to favor the Retention and Substrate functions and the lower the likelihood of the Flow  
 270 function. Lastly, the probability of each of the four functions increased notably with the  
 271 wood's anchoring degree (number of anchor ends).

272

## 273 **Discussion**

274 Through an extensive three-year seasonal tracking of stream wood following forest fires,  
 275 we have produced empirical evidence that fire and season alter the likelihood of ecologically  
 276 important wood functions. The success of postfire restoration efforts to offset the long-term  
 277 impacts of forest wildfires in lotic ecosystems will benefit from our result that wood burned  
 278 level can affect specific functions. In a fire-prone region with marked seasonality, we have

also demonstrated that the probability of ecologically important functions follows seasonality. This intra-annual dynamic had not been examined previously. We expect our results will guide postfire restoration efforts in freshwater ecosystems as changing global climate and ongoing anthropogenic activities combine to increase the frequency and severity of fire around the world (Moreira et al. 2011, Coogan et al. 2019).

### *Effect of wood burning level on its functions in streams*

Our results strongly support that one of the main ecological functions of wood in world rivers, i.e. to provide substrate for biological organisms (Tank & Webster 1998, Dossi et al. 2020), can be negatively affected in heavily burned wood. This result expands upon another study investigating effects on the same functions, which did not establish a significant direct relationship with wood burn status, most likely because it considered the functions lumped together and reduced to simple binary criteria — with/without function (Vaz et al. 2013b). Our approach suggests that substrate provisioning by wood may be especially affected in the future, considering the growing global trend for more intense and severe wildfires (Moreira et al. 2011, Coogan et al. 2019) that are more likely to yield heavily burned wood (Agee 1993). Larger proportions of heavily burned wood serving less as substrate for vegetation, periphyton, biofilm, and ovipositions can negatively affect many xylobiont species and ultimately have implications for the response of the entire stream food web. Via heavily burned wood, future wildfire severity might generally promote lower densities and diversities of fish and invertebrates nearby this wood (Pilotto et al. 2014, Foote et al. 2020).

### *Seasonal effects on stream wood functions*

Our expectation that the probability of each stream wood function would change intra-annually was confirmed for three of the four functions studied and the probability of non-observable function was also nearly twice as high in the fall as in the spring. These results are novel and largely congruent with previous research showing the importance of season in the dynamics of ecological processes in non-perennial streams (Gasith & Resh 1999, García-Roger et al. 2011, Hodges & Magoulick 2011, Verkaik et al. 2013, Senter et al. 2017). None of these previous studies, however, documented the seasonal variation in the probability of each function for individual stream wood pieces. Such knowledge can help restoration projects to make the most functional benefit of wood according to the time of the year when it is added to the stream. On the other hand, it is noteworthy that a function can be crucial even when it is less likely. For example, our results showed, as expected, that flow deflection — including pool habitat formation — was less likely in the dry season relative to spring. Notwithstanding, it is also during that critical period that pool formation is paramount to increase the availability of food or refugia at the habitat scale in non-perennial Mediterranean rivers (Elliot 2000, Pires et al. 2010, Howell et al. 2012).

### *Covariate effects*

Our data have comprehensively shown that varying primary metrics applied to stream wood (Wohl et al. 2010) drive specific functions along with the burning level. Among wood relationships with the stream channel, our results showed that submergence and anchoring are factors clearly affecting the probability of each of the four functions following wildfires. Interestingly, we found different submergence levels to result in positive or negative contributions depending on the function, whereas greater anchoring was bound to increase

the probability of all the functions examined. Thus, an eventual manipulation of stream wood submergence must take into account the function to be promoted. For instance, considering that heavily burned wood acts less as substrate, according to our results, that may be compensated by the presence of wood in the lower half of the channel after the fire. As for structural attributes, greater decay also has proven to be relevant in fostering the four wood functions as expected. This result is in line with previous research documenting decayed stream wood contributing more to matter retention, forming jams, bank stability, and riffle and pool formation (Gurnell et al. 1995, Jones et al., 2011). Our data also highlight that some widely used metrics seemed to affect only certain functions. Although the “size paradigm” (Vaz et al. 2013b) assumes larger-sized pieces to provide more function, our results go further by suggesting the effect of wood size to be much more function-specific. For instance, the wood length was only more likely to have a notable positive effect on the probability of flow deflection.

### *Management implications*

Our study clearly demonstrates that wood burned level matters for the probability of its specific functions in streams of burnt areas and therefore managers must account for it in future postfire restoration campaigns. Given the high recruitment of wood following forest wildfires (Vaz et al. 2015) and the controversial impetus to remove some of it (e.g., to eliminate stream blockage), our study suggests the selective removal of the most heavily carbonized wood would allow wood to persist with the greatest potential to provide substrate for the stream biota. Nonetheless, even heavily burned wood can provide structural complexity and cover for fish, both of vital importance in sand-bed streams for instance (Gurnell et al. 1995). If wood must be removed postfire, for safety reasons, the burning level

should not be the only criteria in choosing pieces to remove. For example, the relative non-attraction of heavily burned wood as substrate can be compensated for by other wood in the system with characteristics enhancing this function, such as wood deeper within the bankfull area, and with large diameters. If the objective is to prevent postfire wood from moving downstream, a reasonable approach would be to remove pieces most likely to be mobilized, those that are not buried, submerged deep in the channel, relatively small, not braced, and lack rootwads (Merten et al. 2010).

Managers should also give consideration to adding unburned wood to streams postfire. Wood additions will be particularly valuable in areas that burned with high intensity, leading to a triple damaging situation where most wood recruited to the stream is heavily burned, postfire hydrology favors wood export, and large unburned wood may not be recruited to the stream for decades. Adding unburned wood provides better substrate and bolsters other wood functions. If the goal is to reduce the loss of substrate function or reduce the damage from related fire impacts (e.g., to dampen postfire hydrographs or store postfire sediment) then wood additions should occur immediately after the fire. Alternatively, if the goal is to reduce the loss of overall wood function in the long term until riparian regrowth is sufficient to again recruit unburned wood, managers might consider waiting until postfire hydrographs have begun to recover and added wood is less likely to be exported.

The time frame of ecological restoration operations is particularly relevant when considering disturbed streams, whether as a result of natural or anthropogenic influences, and their recovery after disturbance (Gurnell et al. 1995). As such, we highlight one novelty of our study by showing that primary wood functions are not static in the lotic ecosystem and documenting its intra-annual dynamics in non-perennial Mediterranean streams. Because such seasonal effects are likely widespread in other systems, we advocate restorers elsewhere to undertake similar pilot tracking of stream wood functions prior to large-scale stream

restoration campaigns and thus identifying function-season relationships for the functions to be promoted. The timing (and method) used for wood placement should then be appropriate to the functions to be promoted but also to the deep knowledge of the local ecology. For example, some adverse impacts can be avoided by scheduling work to avoid fish spawning and other environmentally sensitive periods (Anton et al. 2011).

Broadly, our results must be integrated into the knowledge resulting from tens of thousands of projects in which wood has been used to enhance in-river habitat throughout the world for over a century (Bernhardt et al. 2005, Thompson et al. 2018). We provide guidance as to when and what stream wood to remove — provided it is indeed necessary — as well as to the characteristics of the wood to be kept or added after fires when considering the attribute-probability of function relationships here established. We hope the results help to inform successful management efforts, as is increasingly asked from the science of restoration ecology (Suding et al. 2015).

# **Authors' contributions**

PGV, CTR, PP conceived and designed the experiment; PGV collected the data, analyzed the data, and led the writing; ECM advised on field methods. All authors contributed critically to the drafts and gave final approval for publication.

# **Data Accessibility Statement**

The data used in this study will be deposited in the Figshare data repository after publication.

## References

- Abbe, T.B. & Montgomery, D.R. (2003) Patterns and processes of wood debris accumulation in the Queets river basin, Washington. *Geomorphology*, 51, 81–107.
- Agee, J.K. (1993) Fire ecology of Pacific Northwest forests. Island Press, Covelo, Washington.
- Anton, A., Elozegi, A., García-Arberas, L., Díez, J.R. & Rallo, A. (2011) Restoration of dead wood in Basque stream channels: effects on brown trout population. *Ecology of Freshwater Fish*, 20, 461–471.
- Arseneault, D., Boucher, E. & Bouchon, E. (2007) Asynchronous forest-stream coupling in a fire-prone boreal landscape: insights from woody debris. *Journal of Ecology*, 95, 789–801.
- Bernhardt, E. S., Palmer, M. A., Allan, J. D., Alexander, G., Barnas, K., Brooks, S., ... Sudduth, E. (2005). Synthesizing U.S. river restoration efforts. *Science*, 308, 636–637.
- Bürkner PC. (2017) brms: an R package for Bayesian multilevel models using Stan. *Journal of Statistical Software*, 80, 1–28. doi:10.18637/jss.v080.i01
- Chen, X., Wei, X., Scherer, R. & Hogan, D. (2008) Effects of large woody debris on surface structure and aquatic habitat in forested streams, southern interior British Columbia, Canada. *River Research and Applications*, 24, 862–875.
- Clark M. (2020) lazerhawk: Miscellaneous functions mostly inspired by synthwave. R package version 0.2.4. [github.com/m-clark/lazerhawk](https://github.com/m-clark/lazerhawk)
- Coe, H.J., Kiffney, P.M., Pess, G.R., Kloehn, K.K. & McHenry, M.L. (2009) Periphyton and invertebrate response to wood placement in large pacific coastal rivers. *River Research and Applications*, 25, 1025–1035.
- Coogan, S.C.P., Robinne, F.N., Jain, P. & Flannigan, M.D. (2019) Scientists' warning on wildfire - a Canadian perspective. *Canadian Journal of Forest Research*, 49, 1015–1023.
- Cordova, J.M., Rosi-Marshall, E.J., Yamamuro, A.M. & Lamberti, G.A. (2007) Quantity, controls and functions of large woody debris in Midwestern USA streams. *River Research and Applications*, 23, 21–33.

421 Craveiro, J., Bernardino, J., Mira, A. & Vaz, P.G. (2018) Impact of culvert flooding on  
422 carnivore crossings. *Journal of Environmental Management*, 231, 878–885.

423 Dossi, F., Leitner, P. & Graf, W. (2020) Age matters: substrate-specific colonization patterns  
424 of benthic invertebrates on installed large wood. *Aquatic Ecology*, 54, 741–760.

425 Elliott, J.M. (2000) Pools as refugia for brown trout during two summer droughts: trout  
426 responses to thermal and oxygen stress. *Journal of Fish Biology*, 56, 938–948.

427 Enefalk, A. & Bergman, E. (2016) Effects of fine wood on macroinvertebrate drift in four  
428 boreal forest streams. *Hydrobiologia*, 765, 317–327.

429 Feld, C. K., Birk, S., Bradley, D. C., Hering, D., Kail, J., Marzin, A., ...Pletterbauer, F.  
430 (2011). From natural to degraded rivers and back again: A test of restoration ecology theory  
431 and practice. *Advances in Ecological Research*, 44, 119–209.

432 Flores, L., Giorgi, A., González, J.M., Larrañaga, A., Díez, J.R. & Elozegi, A. (2017) Effects  
433 of wood addition on stream benthic invertebrates differed among seasons at both habitat and  
434 reach scales. *Ecological Engineering*, 106, 116–123.

435 Foote, K.J., Biron, P.M. & Grant, J.W.A. (2020) Impact of in-stream restoration structures on  
436 salmonid abundance and biomass: an updated meta-analysis. *Canadian Journal of Fisheries*  
437 *and Aquatic Sciences*, 77, 1574–1591.

438 García-Roger, E., del Mar Sánchez-Montoya, M., Gómez, R., Suárez, M., Vidal-Abarca, M.,  
439 Latron, J., Rieradevall, M. & Prat, N. (2011) Do seasonal changes in habitat features  
440 influence aquatic macroinvertebrate assemblages in perennial versus temporary  
441 Mediterranean streams? *Aquatic Sciences*, 73, 567–579.

442 Gasith, A. & Resh, V.H. (1999) Streams in the Mediterranean climate regions: Abiotic  
443 influences and biotic responses to predictable seasonal events. *Annual Review of Ecology*  
444 *and Systematics*, 30, 51–81.

445 Gelman A. 2020. Prior choice recommendations. URL: [https://github.com/stan-](https://github.com/stan-dev/stan/wiki/Prior-Choice-Recommendations)  
446 [dev/stan/wiki/Prior-Choice-Recommendations](https://github.com/stan-dev/stan/wiki/Prior-Choice-Recommendations) (accessed on 26 May 2020).

447 Grabowski, R.C., Gurnell, A.M., Burgess-Gamble, L., England, J., Holland, D., Klaar, M.J.,  
448 Morrissey, I., Uttley, C. & Wharton, G. (2019) The current state of the use of large wood in  
449 river restoration and management. *Water and Environment Journal*, 33, 366–377.

450 Gregory, S.V., Boyer, K.L. & Gurnell, A.M. (2003) The ecology and management of wood in  
451 world rivers. American Fisheries Society, Bethesda, Maryland; USA.

452 Gurnell, A.M., Gregory, K.J. & Petts, G.E. (1995) The role of coarse woody debris in forest  
453 aquatic habitats: Implications for management. *Aquatic Conservation: Marine and Freshwater*  
454 *Ecosystems*, 5, 143–166.

455 Hodges, S. & Magoulick, D. (2011) Refuge habitats for fishes during seasonal drying in an  
456 intermittent stream: movement, survival and abundance of three minnow species. *Aquatic*  
457 *Sciences*, 73, 513–522.

458 Howell, T.D., Arthington, A.H., Pusey, B.J., Brooks, A.P., Creese, B. & Chaseling, J. (2012)  
459 Responses of Fish to Experimental Introduction of Structural Woody Habitat in Riffles and  
460 Pools. *Restoration Ecology*, 20, 43–55.

461 Hyde, J.C., Smith, A.M.S., Ottmar, R.D., Alvarado, E.C., & Morgan, P. (2011) The  
462 combustion of sound and rotten coarse woody debris: a review. *International Journal of*  
463 *Wildland Fire*, 20, 163–174.

464 Howell, T.D., Arthington, A.H., Pusey, B.J., Brooks, A.P., Creese, B. & Chaseling, J. (2012)  
465 Responses of Fish to Experimental Introduction of Structural Woody Habitat in Riffles and  
466 Pools. *Restoration Ecology*, 20, 43–55.

467 Jones, T.A. & Daniels, L.D. (2008) Dynamics of large woody debris in small streams  
468 disturbed by the 2001 Dogrib fire in the Alberta foothills. *Forest Ecology and Management*,  
469 256, 1751–1759.

470 Jones, T.A., Daniels, L.D. & Powell, S.R. (2011) Abundance and function of large woody  
471 debris in small, headwater streams in the Rocky Mountain foothills of Alberta, Canada. *River*  
472 *Research and Applications*, 27, 297–311.

473 Kail, J., Hering, D., Muhar, S., Gerhard, M. & Preis, S. (2007) The use of large wood in  
474 stream restoration: experiences from 50 projects in Germany and Austria. *Journal of Applied*  
475 *Ecology*, 44, 1145–1155.

476 McDonald, L.A., Grayson, K.L., Lin, H.A. & Vonesh, J.R. (2018) Stage-specific effects of  
477 fire: Effects of prescribed burning on adult abundance, oviposition habitat selection, and  
478 larval performance of Cope’s Gray Treefrog (*Hyla chrysoscelis*). *Forest Ecology and*  
479 *Management*, 430, 394–402.

480 McLachlan, A.J. (1970) Submerged trees as a substrate for benthic fauna in the recently  
481 created Lake Kariba (Central Africa). *Journal of Applied Ecology*, 7, 253–266.

482 Magilligan, F.J., Nislow, K.H., Fisher, G.B., Wright, J., Mackey, G. & Laser, M. (2008) The  
483 geomorphic function and characteristics of large woody debris in low gradient rivers, coastal  
484 Maine, USA. *Geomorphology*, 97, 467–482.

485 Merten, E.C., Vaz, P.G., Decker-Fritz, J.A., Finlay, J.C. & Stefan, H.G. (2013) Relative  
486 importance of transport, breakage, and decay as processes depleting large wood from  
487 streams. *Geomorphology*, 190, 40–47.

488 Merten, E.C., Snobl, Z.R., & Wellnitz, T.A. (2014) Microhabitat influences on stream insect  
489 emergence. *Aquatic Sciences*, 76, 165–172.

490 Molokwu, N.D., Vaz, P.G., Bradshaw, T., Blake, A., Hennessey, C. & Merten, E.C. (2014)  
491 Effects of substrate on the benthic macroinvertebrate community: an experimental approach.  
492 *Ecological Engineering*, 73, 109–114.

493 Moreira, F., Vaz, P., Catry, F. & Silva, J.S. (2009) Regional variations in wildfire  
494 susceptibility of land-cover types in Portugal: implications for landscape management to  
495 minimize fire hazard. *International Journal of Wildland Fire*, 18, 563–574.

496 Moreira, F., Viedma, O., Arianoutsou, M., Curt, T., Koutsias, N., Rigolot, E., Barbati, A.,  
497 Corona, P., Vaz, P., Xanthopoulos, G., Mouillot, F. & Bilgili, E. (2011) Landscape - wildfire  
498 interactions in southern Europe: Implications for landscape management. *Journal of*  
499 *Environmental Management*, 92, 2389–2402.

500 Mutz, M. (2000) Influences of woody debris on flow patterns and channel morphology in a  
501 low energy, sand-bed stream reach. *International Review of Hydrobiology*, 85, 107–121.

502 Newbrey, M.G., Bozek, M.A., Jennings, M.J. & Cook, J.E. (2005) Branching complexity and  
503 morphological characteristics of coarse woody structure as lacustrine fish habitat. *Canadian*  
504 *Journal of Fisheries and Aquatic Sciences*, 62, 2110–2123.

505 Osei, N.A., Gurnell, A.M. & Harvey, G.L. (2015) The role of large wood in retaining fine  
506 sediment, organic matter and plant propagules in a small, single-thread forest river.  
507 *Geomorphology*, 235, 77–87.

508 Parsons, M. & Thoms, M.C. (2007) Hierarchical patterns of physical-biological associations  
509 in river ecosystems. *Geomorphology*, 89, 127–146.

510 Pilotto, F., Bertoncin, A., Harvey, G.L., Wharton, G. & Pusch, M.T. (2014) Diversification of  
511 stream invertebrate communities by large wood. *Freshwater Biology*, 59, 2571–2583.

512 Pires, D.F., Pires, A.M., Collares-Pereira, M.J. & Magalhães, M.F. (2010) Variation in fish  
513 assemblages across dry-season pools in a Mediterranean stream: effects of pool morphology,  
514 physicochemical factors and spatial context. *Ecology of Freshwater Fish*, 19, 74–86.

515 R Core Team (2020) R: A language and environment for statistical computing. R Foundation  
516 for Statistical Computing, Vienna, Austria. <https://www.R-project.org/>.

517 Raven, P., N. Holmes, J. Pádua, J. Ferreira, S. Hughes, L. Baker, L. Taylor, and K. Seager.  
518 (2009) River habitat survey in southern Portugal. Results from 2009. Environment Agency,  
519 Bristol, UK. (Available from: [www.riverhabitatsurvey.org/?page\\_id=49](http://www.riverhabitatsurvey.org/?page_id=49))

520 Rosenfeld, J.S. & Huato, L. (2003) Relationship between large woody debris characteristics  
521 and pool formation in small coastal British Columbia streams. *North American Journal of*  
522 *Fisheries Management*, 23, 928–938.

523 Senter, A.E., Pasternack, G.B., Piégay, H., Vaughan, M.C. & Lehy, J.S. (2017) Wood  
524 export varies among decadal, annual, seasonal, and daily scale hydrologic regimes in a large,  
525 Mediterranean climate, mountain river watershed. *Geomorphology*, 276, 164–179.

526 Silva, J.S., Moreira, F., Vaz, P., Catry, F. & Godinho-Ferreira, P. (2009) Assessing the  
527 relative fire proneness of different forest types in Portugal. *Plant Biosystems*, 143, 597–608.

528 Silva, J.S., Vaz, P.G., Moreira, F., Catry, F. & Rego, F.C. (2011) Wildfires as a major driver  
529 of landscape dynamics in three fire-prone areas of Portugal. *Landscape and Urban Planning*,  
530 101, 34–358.

531 Strahler, A. (1957) Quantitative analysis of watershed geomorphology. *Transactions of the*  
532 *American Geophysical Union*, 38, 913–920.

533 Suding, K., Higgs, E., Palmer, M., Callicott, J. B., Anderson, C. B., Baker, M., ... Gutrich, J.  
534 J. (2015). Committing to ecological restoration. *Science*, 348, 638–640.

535 Tank, J.L. & Webster, J.R. (1998) Interaction of substrate and nutrient availability on wood  
536 biofilm processes in streams. *Ecology*, 79, 2168–2179.

537 Thompson, M.S.A., Brooks, S.J., Sayer, C.D., Woodward, G., Axmacher, J.C., Perkins, D.M.  
538 & Gray, C. (2018) Large woody debris “rewilding” rapidly restores biodiversity in riverine  
539 food webs. 55, 895–904.

540 Vaz, P.G., Warren, D.R., Pinto, P., Merten, E.C., Robinson, C.T. & Rego, F.C. (2011) Tree  
541 type and forest management effects on the structure of stream wood following wildfires.  
542 *Forest Ecology and Management*, 262, 561–570.

543 Vaz, P.G., Warren, D.R., Merten, E.C., Robinson, C., Pinto, P. & Rego, F.C. (2013a) Effects  
544 of forest type and stream size on volume and distribution of stream wood: legacies of wildfire  
545 in a Euro-Mediterranean context. *Freshwater Science*, 32, 126–141.

546 Vaz, P.G., Merten, E.C., Warren, D.R., Robinson, C.T., Pinto, P. & Rego, F.C. (2013b)  
547 Which stream wood becomes functional following wildfires? *Ecological Engineering*, 54,  
548 82–89.

549 Vaz, P.G., Dias, S., Pinto, P., Merten, E.C., Robinson, C.T., Warren, D.R. & Rego, F.C.  
550 (2014) Effects of burn status and conditioning on colonization of wood by stream  
551 macroinvertebrates. *Freshwater Science*, 33, 832–846.

552 Vaz, P.G., Merten, E.C., Warren, D.R., Durscher, K., Tapp, M., Robinson, C.T., Rego, F.C.  
553 & Pinto, P. (2015) Fire meets inland water via burned wood: and then what? *Freshwater*  
554 *Science*, 34, 1468–1481.

555 Venables WN, Ripley BD. 2002. Modern applied statistics with S, 4th ed.. New York, NY:  
556 Springer.

557 Verkaik, I., Vila-Escalé, M., Rieradevall, M. & Prat, N. (2013) Seasonal drought plays a  
558 stronger role than wildfire in shaping macroinvertebrate communities of Mediterranean  
559 streams. *International Review of Hydrobiology*, 98, 271–283.

560 Watanabe S. 2010. Asymptotic equivalence of Bayes cross validation and widely applicable  
561 information criterion in singular learning theory. *Journal of Machine Learning Research*, 11,  
562 3571–3594.

563 Wohl, E., Cenderelli, D.A., Dwire, K.A., Ryan-Burkett, S.E., Young, M.K. & Fausch, K.D.  
564 (2010) Large in-stream wood studies: a call for common metrics. *Earth Surface Processes and*  
565 *Landforms*, 35, 618–625.

566 Zelt, R.B. & Wohl, E.E. (2004) Channel and woody debris characteristics in adjacent burned  
567 and unburned watersheds a decade after wildfire, Park County, Wyoming. *Geomorphology*,  
568 57, 217–233.

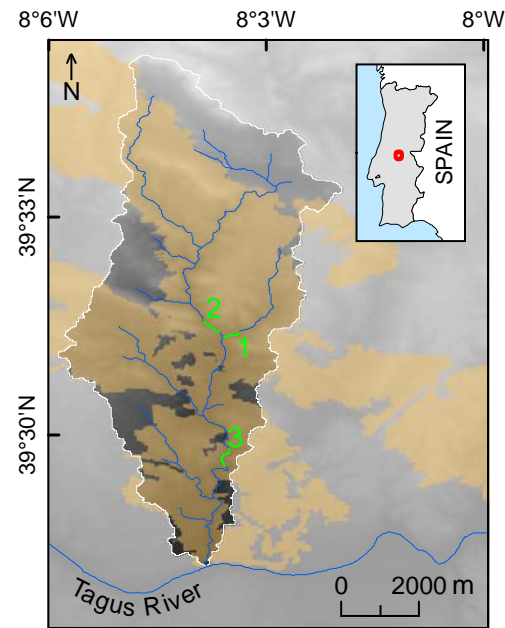

**Figure 1.** Location of the sampling sites (highlighted green lines) and 2003–2007 fire areas (orange polygons) in east-central Portugal. Three stream reaches were assessed (one each from 1<sup>st</sup>-, 2<sup>nd</sup>-, and 3<sup>rd</sup>-order streams; numbers stand for the orders) within the Rio Frio subbasin (white outlined) of the Tagus River.

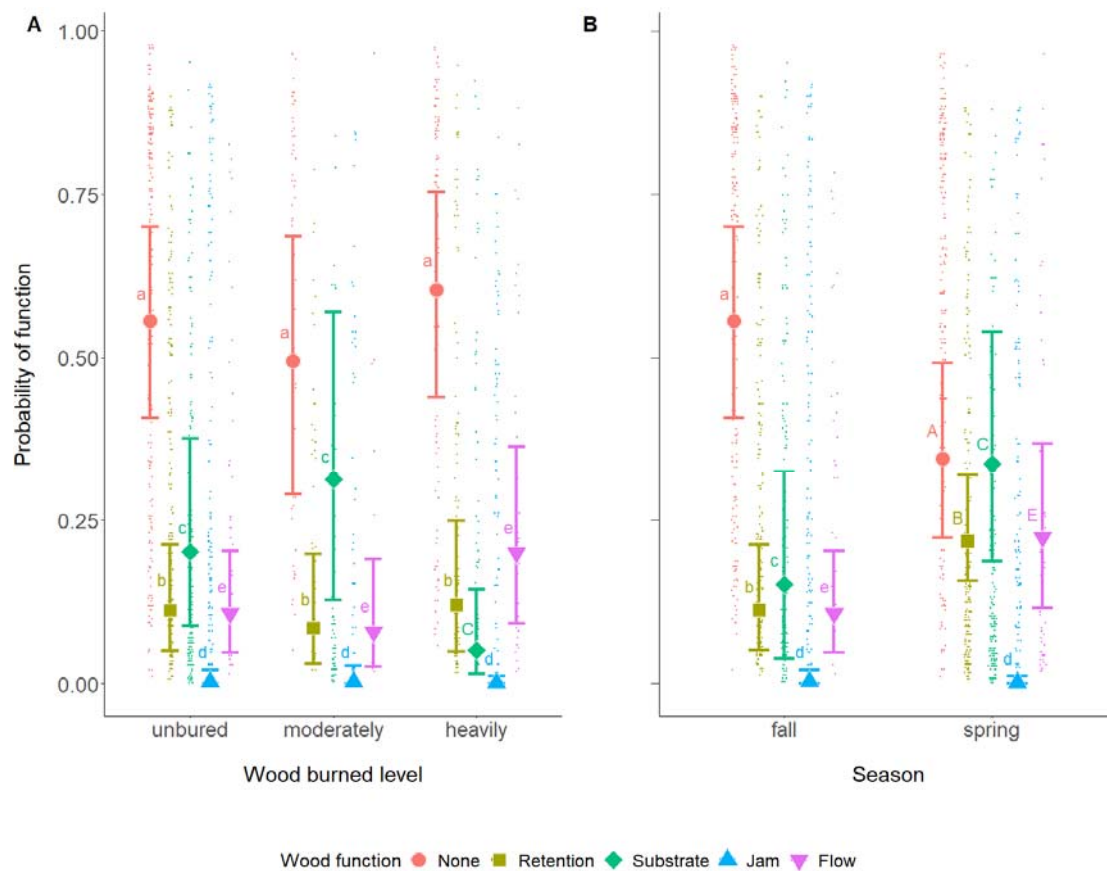

**Figure 2.** Mean fitted values ( $\pm$  95% credible intervals) by stream wood burned level (A) and season (B) for the optimal multinomial logistic mixed-effects Bayesian model predicting the effects of these and other covariates on the main observable functions of stream wood. Small dots are predicted values. Different letter cases between levels of the same variable denote greater/lesser effects under the 95 % credible interval. None = stream wood without observable function; Retention = retaining organic matter; Substrate = serving as a substrate for aquatic biota; Jam = creating debris jams; Flow = deflecting flow (e.g., creating pools or riffles, forming steps).

583 **Table 1.** Characterization of the wood functions monitored over three years in Portuguese  
584 streams.

| Name      | Description                                                                                                                                                                             |
|-----------|-----------------------------------------------------------------------------------------------------------------------------------------------------------------------------------------|
| None      | No function detected after careful observation of the whole wood piece remaining partly or fully within the bankfull channel                                                            |
| Retention | Retaining organic matter such as twigs, leaves, fine organic matter (observable volume $> \sim 10^{-3} \text{ m}^3$ )                                                                   |
| Substrate | Serving as a substrate for aquatic vegetation, periphyton, and/or epixylic biofilms (submersed wood with a conspicuous biofilm layer) or to conspicuous ovipositions (e.g., amphibians) |
| Jam       | Creating debris jams (e.g., bracing other stream wood debris or serving as a key piece forming wood jams)                                                                               |
| Flow      | Deflecting flow (e.g., creating pools or riffles, forming steps).                                                                                                                       |

585

**Table 2.** Variable summary by stream wood function, including counts by level in categorical variables and mean  $\pm$  SE in numerical variables.

| Variable                             |             | Wood function    |                  |                  |                  |                  |                  |
|--------------------------------------|-------------|------------------|------------------|------------------|------------------|------------------|------------------|
|                                      |             | None             | Retention        | Substrate        | Jam              | Flow             | <i>all</i>       |
| season                               | fall        | 208              | 185              | 162              | 114              | 31               | 700              |
|                                      | spring      | 194              | 200              | 206              | 109              | 62               | 771              |
| burned level                         | unburned    | 229              | 216              | 227              | 123              | 43               | 838              |
|                                      | moderately  | 62               | 55               | 83               | 37               | 11               | 248              |
| submergence                          | heavily     | 111              | 114              | 58               | 63               | 39               | 385              |
|                                      | span        | 82               | 94               | 138              | 28               | 52               | 394              |
| decay                                | lower part  | 56               | 53               | 163              | 9                | 27               | 308              |
|                                      | upper part  | 264              | 238              | 67               | 186              | 14               | 769              |
| form                                 | sound       | 279              | 228              | 188              | 122              | 45               | 862              |
|                                      | decayed     | 123              | 157              | 180              | 101              | 48               | 609              |
| position                             | straight    | 235              | 180              | 186              | 176              | 59               | 836              |
|                                      | bent        | 167              | 205              | 182              | 47               | 34               | 635              |
| stream order                         | ramp/bridge | 339              | 331              | 209              | 187              | 57               | 1123             |
|                                      | loose       | 63               | 54               | 159              | 36               | 36               | 348              |
| complexity (no.)                     | 1st         | 106              | 225              | 52               | 47               | 34               | 464              |
|                                      | 2nd         | 129              | 64               | 236              | 72               | 29               | 530              |
| diameter (cm)                        | 3rd         | 167              | 96               | 80               | 104              | 30               | 477              |
|                                      |             | 8.98 $\pm$ 0.23  | 11.24 $\pm$ 0.34 | 10.90 $\pm$ 0.34 | 11.69 $\pm$ 0.39 | 11.20 $\pm$ 0.71 | 10.60 $\pm$ 0.16 |
| length (m)                           |             | 4.06 $\pm$ 0.14  | 5.91 $\pm$ 0.18  | 4.54 $\pm$ 0.17  | 4.94 $\pm$ 0.21  | 4.74 $\pm$ 0.36  | 4.84 $\pm$ 0.09  |
|                                      |             | 55.45 $\pm$ 1.79 | 55.92 $\pm$ 1.69 | 75.01 $\pm$ 1.58 | 40.02 $\pm$ 2.16 | 67.85 $\pm$ 3.35 | 58.91 $\pm$ 0.91 |
| within bankfull (%)                  |             | 1.98 $\pm$ 0.04  | 2.91 $\pm$ 0.05  | 2.30 $\pm$ 0.06  | 2.86 $\pm$ 0.06  | 2.17 $\pm$ 0.11  | 2.45 $\pm$ 0.03  |
|                                      |             | 0.73 $\pm$ 0.06  | 0.70 $\pm$ 0.05  | 1.09 $\pm$ 0.06  | 0.90 $\pm$ 0.10  | 0.90 $\pm$ 0.11  | 0.85 $\pm$ 0.03  |
| distance to bank (m)                 |             | 4.65 $\pm$ 0.38  | 9.12 $\pm$ 0.70  | 6.02 $\pm$ 0.62  | 5.52 $\pm$ 0.61  | 4.78 $\pm$ 0.75  | 6.30 $\pm$ 0.28  |
|                                      |             | 402              | 385              | 368              | 223              | 93               | 1471             |
| <i>Total counts by wood function</i> |             |                  |                  |                  |                  |                  |                  |

**Table 3.** Summary of the fixed part of the multinomial mixed-effects Bayesian model predicting the effects of wood burned level, season, and covariates on the main observable functions of stream wood. Retention = retaining organic matter such; Substrate = serving as a substrate for aquatic biota; Jam = creating debris jams; Flow = deflecting flow (e.g., creating pools or riffles, forming steps). Non-observable function was the reference category. CI = credible interval for the parameter;  $\beta < 0$  = posterior probability under the hypothesis of whether effect is greater (less) than zero if positive (negative); Notable = asterisk on effects whose CI does not contain zero (or with margin very close to zero). Potential scale reduction factor on split chains (Rhat) was 1.00 in all parameters.

| Wood function           | Parameter                 |            | $\beta$ | Error | 2.5% CI | 97.5% CI | $\beta < 0$ | Notable |
|-------------------------|---------------------------|------------|---------|-------|---------|----------|-------------|---------|
| Retention               | intercept                 |            | -1.61   | 0.43  | -2.48   | -0.81    | 1.00        | *       |
|                         | season (reference = fall) | spring     | 0.50    | 0.20  | 0.04    | 0.84     | 0.99        | *       |
|                         | burned level (unburned)   | moderately | -0.15   | 0.43  | -0.99   | 0.67     | 0.64        |         |
|                         |                           | heavily    | -0.01   | 0.37  | -0.72   | 0.73     | 0.52        |         |
|                         | submergence (spanning)    | lower part | 0.94    | 0.52  | -0.07   | 1.94     | 0.96        | *       |
|                         |                           | upper part | -0.04   | 0.34  | -0.70   | 0.63     | 0.56        |         |
|                         | decay (sound)             | decayed    | 1.25    | 0.36  | 0.55    | 1.98     | 1.00        | *       |
|                         | form (straight)           | bent       | 0.79    | 0.33  | 0.16    | 1.45     | 0.99        | *       |
|                         | position (ramp/bridge)    | loose      | 0.30    | 0.42  | -0.54   | 1.13     | 0.76        |         |
|                         | diameter                  |            | 0.19    | 0.20  | -0.20   | 0.59     | 0.84        |         |
|                         | length                    |            | 0.41    | 0.21  | 0.00    | 0.82     | 0.98        | *       |
|                         | % within bankfull         |            | 0.34    | 0.17  | 0.01    | 0.69     | 0.98        | *       |
|                         | no. anchor ends           |            | 1.73    | 0.20  | 1.35    | 2.14     | 1.00        | *       |
|                         | Substrate                 | intercept  |         | -1.03 | 0.48    | -2.00    | -0.13       | 0.99    |
| season (fall)           |                           | spring     | 0.87    | 0.24  | 0.40    | 1.33     | 1.00        | *       |
| burned level (unburned) |                           | moderately | 0.56    | 0.50  | -0.41   | 1.55     | 0.87        |         |
|                         |                           | heavily    | -1.45   | 0.52  | -2.49   | -0.44    | 1.00        | *       |
| submergence (spanning)  |                           | lower part | 0.62    | 0.57  | -0.47   | 1.75     | 0.86        |         |
|                         |                           | upper part | -2.95   | 0.48  | -3.95   | -2.06    | 1.00        | *       |
| decay (sound)           |                           | decayed    | 1.48    | 0.44  | 0.64    | 2.38     | 1.00        | *       |
| form (straight)         |                           | bent       | 0.64    | 0.40  | -0.13   | 1.43     | 0.95        |         |
| position (ramp/bridge)  |                           | loose      | 1.37    | 0.50  | 0.42    | 2.36     | 1.00        | *       |
| diameter                |                           |            | 0.59    | 0.24  | 0.13    | 1.07     | 0.99        | *       |
| length                  |                           |            | 0.35    | 0.26  | -0.16   | 0.87     | 0.91        |         |
| % within bankfull       |                           |            | 0.85    | 0.25  | 0.38    | 1.37     | 1.00        | *       |
| no. anchor ends         |                           |            | 1.24    | 0.22  | 0.81    | 1.69     | 1.00        | *       |
| Jam                     |                           | intercept  |         | -5.25 | 1.11    | -7.56    | -3.26       | 1.00    |
|                         | season (fall)             | spring     | -0.21   | 0.30  | -0.80   | 0.38     | 0.75        |         |
|                         | burned level (unburned)   | moderately | 0.08    | 0.95  | -1.78   | 1.92     | 0.54        |         |
|                         |                           | heavily    | -1.08   | 0.88  | -2.85   | 0.62     | 0.90        |         |
|                         | submergence (spanning)    | lower part | -1.51   | 1.28  | -4.16   | 0.93     | 0.89        |         |
|                         |                           | upper part | 1.75    | 0.75  | 0.36    | 3.32     | 0.99        | *       |
|                         | decay (sound)             | decayed    | 1.26    | 0.74  | -0.19   | 2.74     | 0.96        | *       |
|                         | form (straight)           | bent       | -1.79   | 0.72  | -3.29   | -0.46    | 1.00        | *       |
|                         | position (ramp/bridge)    | loose      | 2.79    | 0.87  | 1.15    | 4.54     | 1.00        | *       |
|                         | diameter                  |            | 0.39    | 0.44  | -0.48   | 1.25     | 0.82        |         |
|                         | length                    |            | -0.49   | 0.45  | -1.41   | 0.36     | 0.87        |         |
|                         | % within bankfull         |            | -1.07   | 0.33  | -1.75   | -0.47    | 1.00        | *       |
|                         | no. anchor ends           |            | 2.46    | 0.45  | 1.64    | 3.40     | 1.00        | *       |
|                         | Flow                      | intercept  |         | -1.65 | 0.42    | -2.54    | -0.89       | 1.00    |
| season (fall)           |                           | spring     | 1.21    | 0.29  | 0.66    | 1.81     | 1.00        | *       |
| burned level (unburned) |                           | moderately | -0.17   | 0.47  | -1.10   | 0.75     | 0.64        |         |
|                         |                           | heavily    | 0.54    | 0.38  | -0.19   | 1.32     | 0.93        |         |
| submergence (spanning)  |                           | lower part | -1.29   | 0.55  | -2.39   | -0.24    | 0.99        | *       |
|                         |                           | upper part | -3.09   | 0.44  | -4.02   | -2.28    | 1.00        | *       |
| decay (sound)           |                           | decayed    | 1.29    | 0.38  | 0.57    | 2.06     | 1.00        | *       |
| form (straight)         |                           | bent       | -0.47   | 0.35  | -1.18   | 0.21     | 0.91        |         |
| position (ramp/bridge)  |                           | loose      | 1.93    | 0.49  | 0.99    | 2.91     | 1.00        | *       |
| diameter                |                           |            | 0.06    | 0.19  | -0.32   | 0.43     | 0.64        |         |
| length                  |                           |            | 0.49    | 0.22  | 0.07    | 0.92     | 0.99        | *       |
| % within bankfull       |                           |            | 0.04    | 0.22  | -0.40   | 0.48     | 0.58        |         |
| no. anchor ends         |                           |            | 0.68    | 0.20  | 0.29    | 1.09     | 1.00        | *       |
